# Supplementary material for: Triptycene-supported bimetallic salen porous organic polymers for high efficiency CO2 fixation to cyclic carbonates
Source: Royal Society of Chemistry journal article supplement (doi:10.1039/d1qi00163a), 2021-01-01
Supplement: d1qi00163a1.pdf [file d1qi00163a1.pdf]

# Electronic Supplementary Information

## **Triptycene-supported bimetallic salen porous organic polymers for high efficiency CO<sub>2</sub> fixation to cyclic carbonates**

Yingting Zheng,<sup>a</sup> Xiqian Wang,<sup>a</sup> Chao Liu,<sup>a</sup> Baoqiu Yu,<sup>a</sup> Wenliang Li,<sup>b</sup> Hailong Wang,<sup>\*a</sup>  
Tingting Sun,<sup>\*a</sup> and Jianzhuang Jiang<sup>\*a</sup>

<sup>a</sup> Beijing Advanced Innovation Center for Materials Genome Engineering, Beijing Key Laboratory for Science and Application of Functional Molecular and Crystalline Materials, Department of Chemistry, School of Chemistry and Biological Engineering, University of Science and Technology Beijing, Beijing 100083, China

<sup>b</sup> Faculty of Chemistry, Northeast Normal University, Changchun 130024, China

\* Corresponding author. E-mail: [hlwang@ustb.edu.cn](mailto:hlwang@ustb.edu.cn) (H. Wang), [ttsun99@ustb.edu.cn](mailto:ttsun99@ustb.edu.cn) (T. Sun) and [jianzhuang@ustb.edu.cn](mailto:jianzhuang@ustb.edu.cn) (J. Jiang)

---

## Experimental section

### General directions

All chemicals were employed as received without further purification. The bimetallic salen macrocycles (salen-Ni and salen-Co) were synthesized as reference according to the reported literature.<sup>S1</sup>

### Synthesis of BSPOPs

A mixture of 2,3,6,7,14,15-hexaammoniumtriptycene hexachloride (0.02 mmol, 13.8 mg), 2,6-diformyl-4-methylphenol (0.06 mmol, 9.8 mg), and metal salt (0.06 mmol, AlCl<sub>3</sub> 8.0 mg, Co(OAc)<sub>2</sub> 10.6 mg or Ni(OAc)<sub>2</sub> 10.6 mg) in 2.0 mL of mesitylene/EtOH (1:1 v/v) in a small vial was sonicated for 15 min. After adding the 180 μL ethanol solution of acetic acid (6.0 mol/L), the mixture was sonicated to afford a homogeneous dispersion. Then this solution was transferred into a pyrex tube and degassed by three freeze-pump-thaw cycles. The tube was sealed off and heated at 120°C for 72 h. The solid was collected by centrifugation and washed with anhydrous THF (3 × 6.0 mL) and acetone (3 × 6.0 mL). The powder was dried at 60°C under vacuum to afford the BSPOP-M (M = Al(III), Co(II), and Ni(II)). With respect to the synthesis of BSPOP-2H for the purpose of characterizing this series of POPs, the whole procedure is strictly followed the above mentioned one for the synthesis of BSPOP-M except without addition of metal salt. BSPOP-M (M = Al(III), Co(II), Ni(II), and BSPOP-2H) were obtained with the yield of 48%, 52%, 54% and 61%, respectively.

### General procedure for CO<sub>2</sub> fixation to cyclic carbonates

Epoxide (15.0 mmol), metallic BSPOPs as catalyst (0.03 mmol, calculated based on

metal sites), and tetrabutylammonium bromide (TBAB) as co-catalyst (0.6 mmol) were added into a 25 mL reaction tube. The reaction mixture was stirred in the presence of carbon dioxide provided by a balloon at certain temperature. After a certain amount of time, the reaction was stopped. The catalysts were separated by centrifugation, and the resulting mixture was analyzed by  $^1\text{H}$  NMR spectroscopy. For catalyst recycling measurement, the catalyst was separated from the reaction mixture by centrifugation and then rinsed with methanol, THF, and acetone, respectively. The recovered catalyst was dried and then reused in the next run. The recycling catalysis experimental was conducted under the above mentioned reaction conditions each time using the dry catalyst recycled from the last run.

### **Instrumentation**

IR spectra were recorded as KBr pellets using a Bruker Tensor 37 spectrometer with  $2.0\text{ cm}^{-1}$  resolution. Solid-state NMR spectra were collected on a 400 MHz Bruker Avance III spectrometer. Powder X-ray diffraction (PXRD) data were recorded on a TTR III multi-function X-ray diffractometer by depositing powder on a quartz sheet, from  $2\theta = 2^\circ$  to  $50^\circ$  with  $1^\circ\text{ min}^{-1}$  increments at room temperature. X-ray photoelectron spectra (XPS) data were collected from Thermo Scientific Escalab 250Xi photoelectron spectrometer. Scanning electron microscope (SEM) images and energy dispersive X-Ray spectroscopy (EDX) were obtained using a HITACHI SU8010 microscopy. The metal content determination was performed through analysis of the samples by inductively coupled plasma optical emission spectrometry (ICP-OES) on a Thermo IRIS Intrepid II XSP spectrometer. Thermal gravimetric analysis (TGA) data were collected on a LECO TGA701 analyzer with a heating rate of  $5^\circ\text{C min}^{-1}$  in the range of  $25\sim 800^\circ\text{C}$  under  $\text{N}_2$  atmosphere. The sorption isotherms were obtained using a Micromeritics ASAP 2020 PLUS HD88 surface area and porosity analyzer.

Before the gas sorption measurements, the powder samples of BSPOPs were degassed at 120°C for 12 h to drastically eliminate the volatile solvents blocked in pores. The permanent porosity of BSPOPs was examined with N<sub>2</sub> and CO<sub>2</sub> as adsorbate. The N<sub>2</sub> sorption isotherms were collected at 77 K, and CO<sub>2</sub> sorption isotherms were obtained at 196, 273, and 298 K, respectively. The temperature of 77, 196, 273, and 298 K was kept using liquid nitrogen bath, acetone/dry ice bath, ice water bath, and water bath at 25°C room with air-condition.

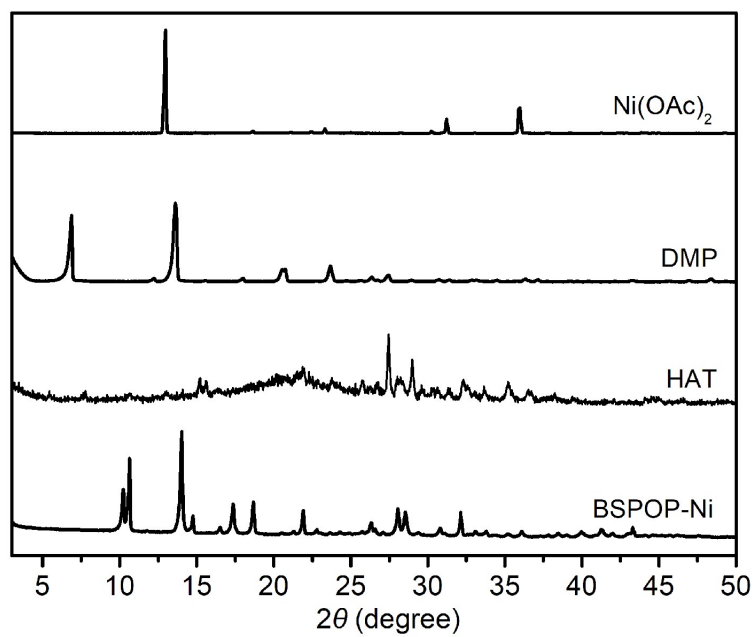

**Fig. S1** Comparison of PXRD patterns between BSPOP-Ni, HAT, DMP and Ni(OAc)<sub>2</sub>.

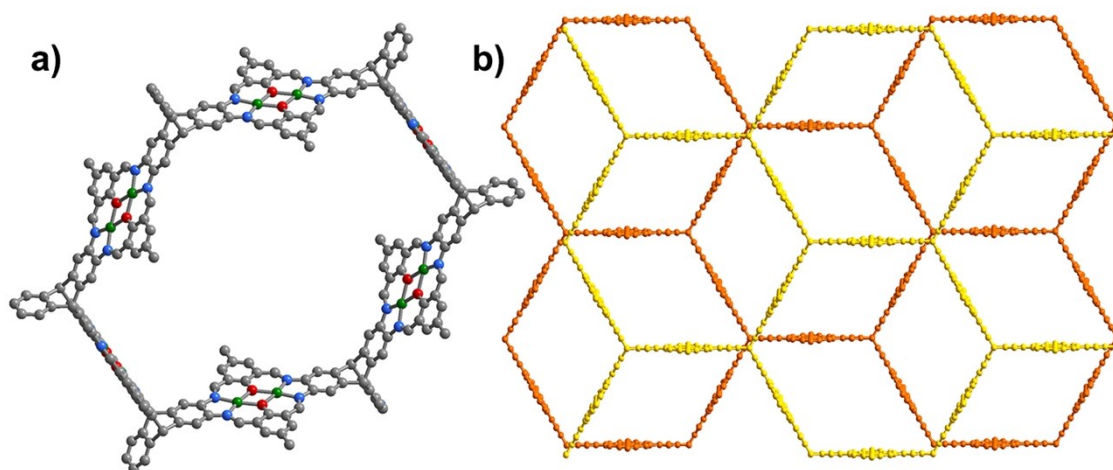

**Fig. S2** A proposed structure model of BSPOP-Ni (a) macrocycle segment and (b) AB packing (different color representing different layers).

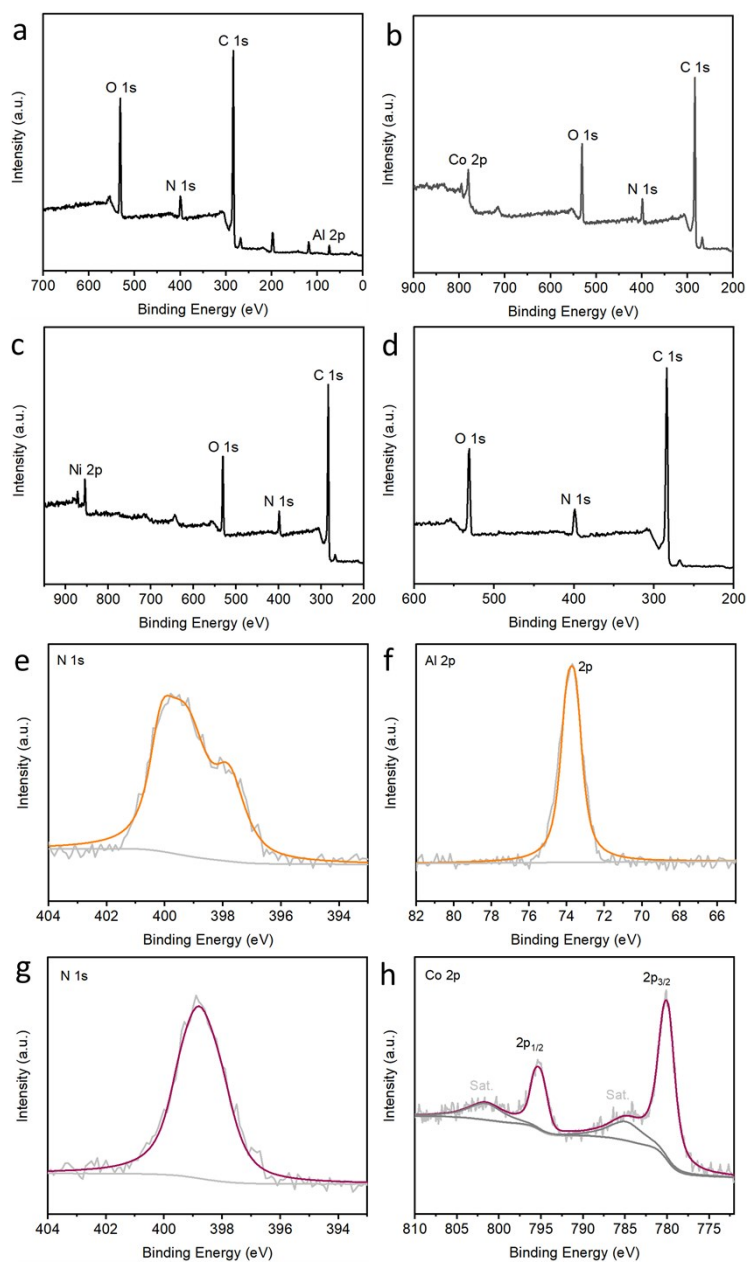

**Fig. S3** XPS spectra of BSPOPs. (a) Survey scan of BSPOP-Al; (b) survey scan of BSPOP-Co; (c) survey scan of BSPOP-Ni; (d) survey scan of BSPOP-2H; (e) N 1s and (f) Al 2p of BSPOP-Al; (g) N 1s and (h) Co 2p of BSPOP-Co.

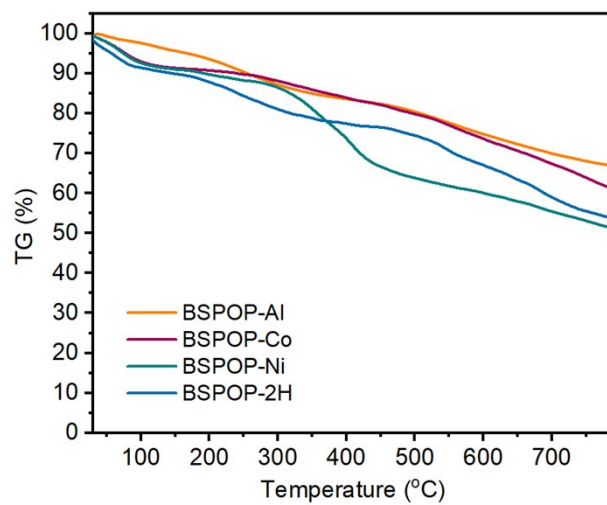

**Fig. S4** Thermal gravimetric analysis (TGA) curves of BSPOPs.

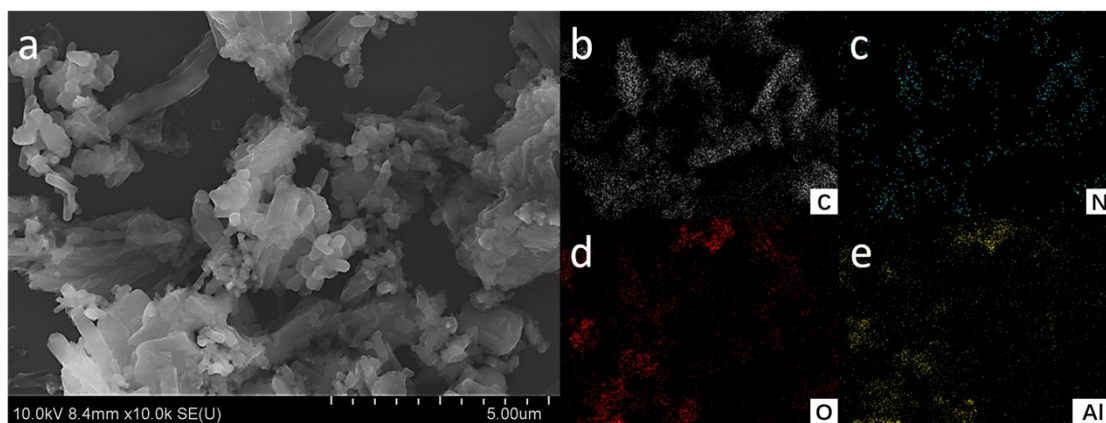

**Fig. S5** (a) SEM and (b~e) EDX elemental mapping images of BSPOP-Al.

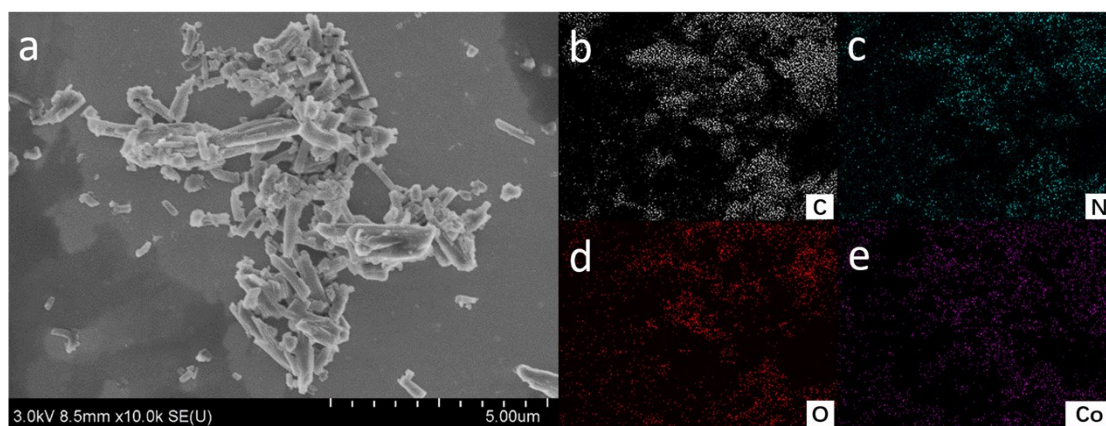

**Fig. S6** (a) SEM and (b~e) EDX elemental mapping images of BSPOP-Co.

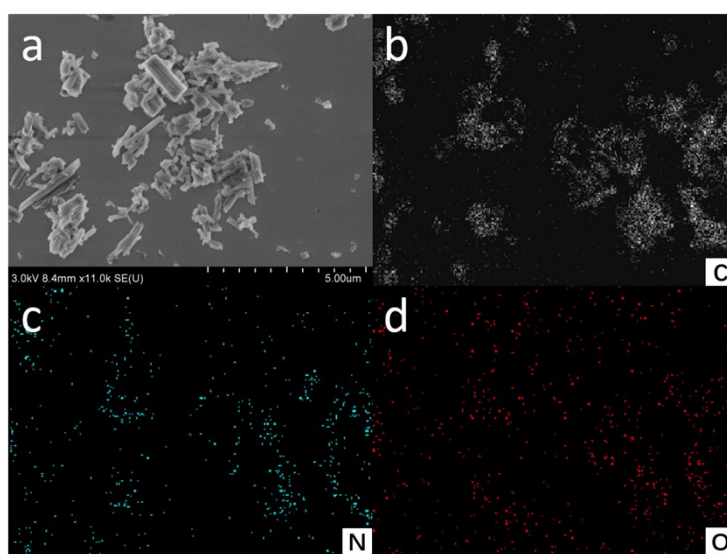

**Fig. S7** (a) SEM and (b~d) EDX elemental mapping images of BSPOP-2H.



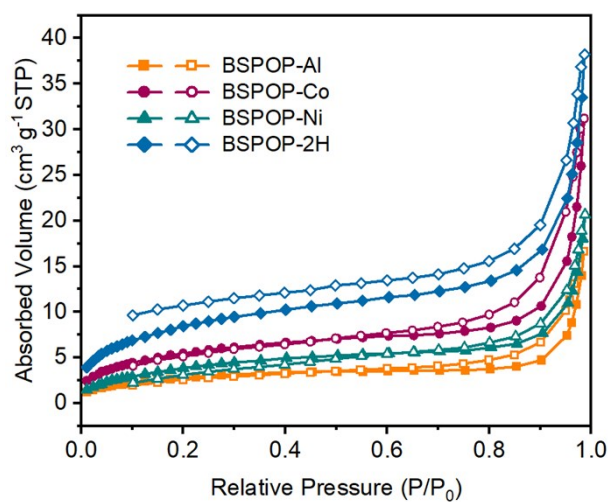

**Fig. S8** Adsorption (filled) and desorption (empty) isotherms of  $N_2$  at 77 K for BSPOPs.

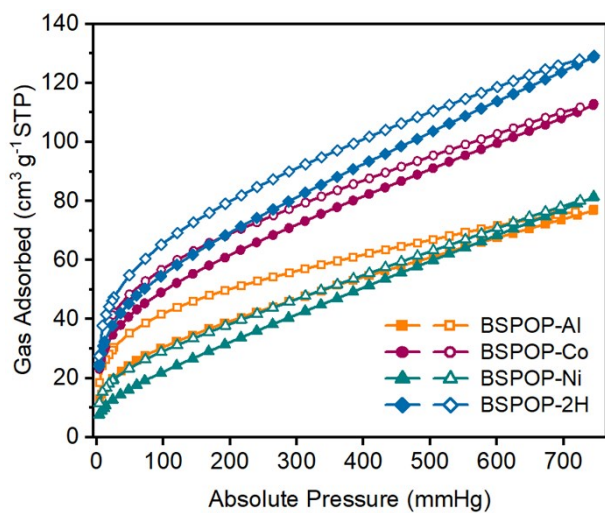

**Fig. S9** Adsorption (filled) and desorption (empty) isotherms of  $CO_2$  at 196 K for BSPOPs.

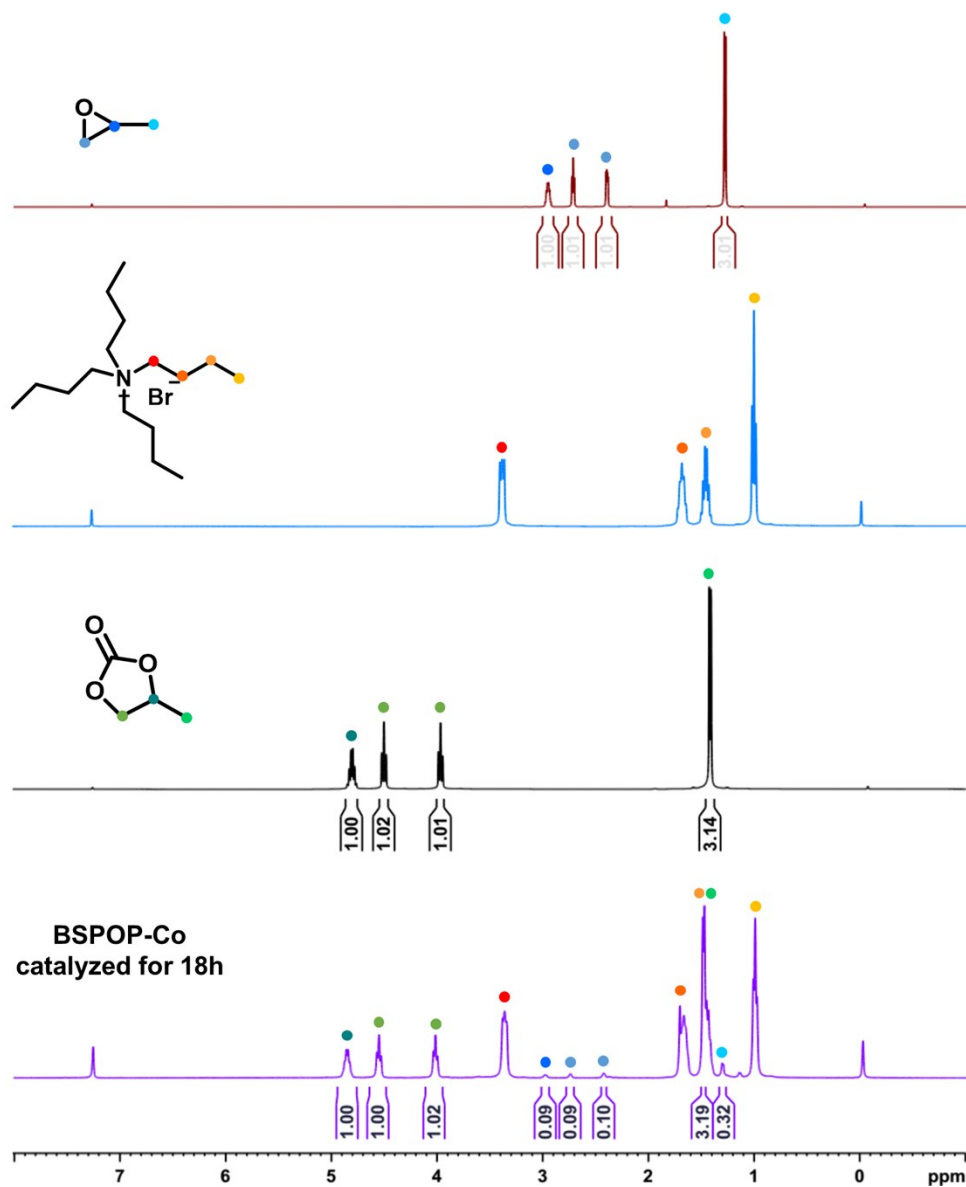

**Fig. S10** <sup>1</sup>H NMR spectra of 1,2-epoxypropane, TBAB, propylene carbonate and BSPOP-Co catalyzed for 18h CO<sub>2</sub> cycloaddition reaction of 1,2-epoxypropane (from top to bottom). Un-marked peaks are for solvent.

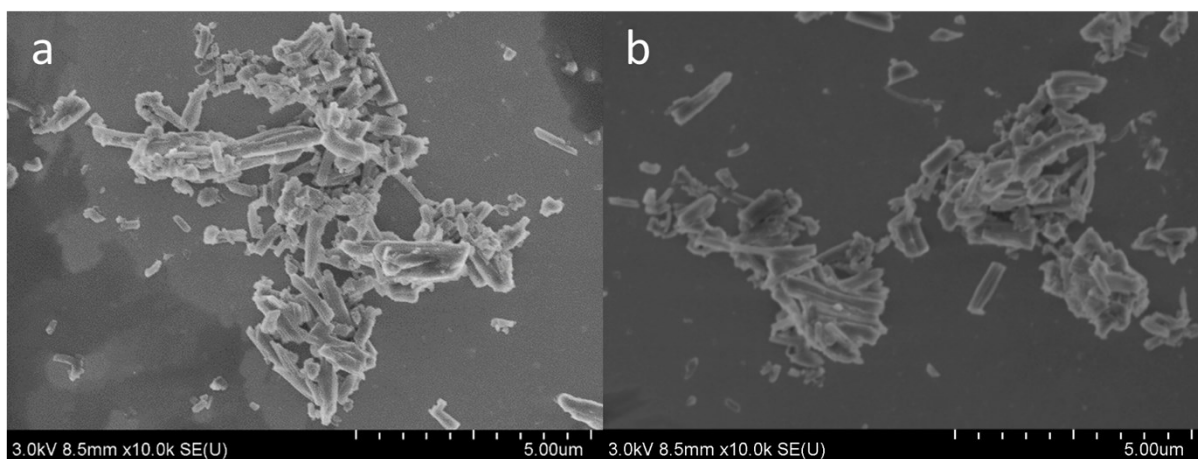

**Fig. S11** SEM images of BSPOP-Co (a) before and (b) after catalysis for five runs.

**Table S1** The ICP-OES data of BSPOP-Al, BSPOP-Co and BSPOP-Ni

| Sample   | Analysis element | Theoretical value | Actual content |
|----------|------------------|-------------------|----------------|
| BSPOP-Al | Al               | 8.9%              | 8.8%           |
| BSPOP-Co | Co               | 16.4%             | 15.0%          |
| BSPOP-Ni | Ni               | 16.3%             | 16.9%          |

**Table S2** CO<sub>2</sub> BET surface, adsorption and  $Q_{st}$  of BSPOPs

| Sample   | $S_{BET}^a$ (m <sup>2</sup> g <sup>-1</sup> ) | CO <sub>2</sub> absorbed volume (cm <sup>3</sup> g <sup>-1</sup> STP) <sup>b</sup> |      | $Q_{st}^c$ (kJ mol <sup>-1</sup> ) |
|----------|-----------------------------------------------|------------------------------------------------------------------------------------|------|------------------------------------|
|          |                                               | 273K                                                                               | 298K |                                    |
| BSPOP-Al | 160.4                                         | 19.4                                                                               | 13.9 | 26.5                               |
| BSPOP-Co | 250.3                                         | 30.3                                                                               | 19.7 | 42.1                               |
| BSPOP-Ni | 142.4                                         | 14.4                                                                               | 10.8 | 29.3                               |
| BSPOP-2H | 280.5                                         | 31.8                                                                               | 22.4 | 30.0                               |

<sup>a</sup>BET surface area of BSPOPs. <sup>b</sup>CO<sub>2</sub> absorption at 760 mmHg. <sup>c</sup>Isosteric heat of CO<sub>2</sub> adsorption.

**Table S3** Comparison of Catalytic Activity of Catalysts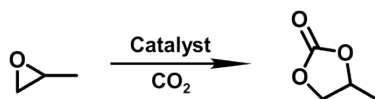

| Entry | Cat.               | Temp.(°C) | Time(h) | $p$ (atm) | Conv.(%) | TON  | TOF(h <sup>-1</sup> ) | Ref.      |
|-------|--------------------|-----------|---------|-----------|----------|------|-----------------------|-----------|
| 1     | BSPOP-Co           | 25        | 18      | 1.0       | 92       | 460  | 26.6                  | This work |
| 2     | 1-Co               | 22        | 48      | 1.0       | 26       | 130  | 3                     | S2        |
| 3     | Co-CMP             | 25        | 48      | 1.0       | 81.5     | 167  | 3.5                   | S3        |
| 4     | Co/POP-TPP         | 29        | 24      | 1.0       | 95.8     | 432  | 18                    | S4        |
| 5     | POP-PBnCl-TPPMg-12 | 30        | 48      | 1.0       | 54.3     | 1086 | 22.6                  | S5        |
| 6     | Al-CPOP            | 120       | 24      | 1.0       | 91       | 91   | 3.8                   | S6        |
| 7     | DVB@ISA            | 60        | 24      | 10        | 99       | 396  | 16.5                  | S7        |
| 8     | ZnPor-CP           | 80        | 16      | 10        | 32       | 400  | 25                    | S8        |

**Table S4** The ICP-OES data of BSPOP-Co before and after catalysis

| <b>Sample</b>                    | <b>Analysis element</b> | <b>Theoretical value</b> | <b>Actual content</b> |
|----------------------------------|-------------------------|--------------------------|-----------------------|
| <b>BSPOP-Co</b> before catalysis | Co                      | 16.4%                    | 15.0%                 |
| <b>BSPOP-Co</b> after catalysis  | Co                      | 16.4%                    | 12.8%                 |

## References

- S1 P. C. Swamy, E. Solel, O. Reany and E. Keinan, Synthetic Evolution of the Multifarene Cavity from Planar Predecessors, *Chem.-Eur. J.* **2018**, *24*, 15319–15328.
- S2 M. H. Alkordi, Ł. J. Weselinski, V. D'Elia, S. Barman, A. Cadiau, M. N. Hedhili, A. J. Cairns, R. G. AbdulHalim, J.-M. Basset and M. Eddaoudi, CO<sub>2</sub> Conversion: the Potential of Porous-Organic Polymers (POPs) for Catalytic CO<sub>2</sub>-Epoxide Insertion, *J. Mater. Chem. A* **2016**, *4*, 7453–7460.
- S3 Y. Xie, T. T. Wang, X. H. Liu, K. Zou and W. Q. Deng, Capture and Conversion of CO<sub>2</sub> at Ambient Conditions by a Conjugated Microporous Polymer, *Nat. Commun.* **2013**, *4*, 1960–1966.
- S4 Z. Dai, Q. Sun, X. Liu, C. Bian, Q. Wu, S. Pan, L. Wang, X. Meng, F. Deng and F.-S. Xiao, Metalated Porous Porphyrin Polymers as Efficient Heterogeneous Catalysts for Cycloaddition of Epoxides with CO<sub>2</sub> under Ambient Conditions, *J. Catal.* **2016**, *338*, 202–209.
- S5 Z. Dai, Y. Tang, F. Zhang, Y. Xiong, S. Wang, Q. Sun, L. Wang, X. Meng, L. Zhao and F.-S. Xiao, Combination of Binary Active Sites into Heterogeneous Porous Polymer Catalysts for Efficient Transformation of CO<sub>2</sub> under Mild Condition, *Chinese J. Catal.* **2021**, *42*, 618–626.
- S6 T.-T. Liu, J. Liang, Y.-B. Huang and R. Cao, A Bifunctional Cationic Porous Organic Polymer Based on a Salen-(Al) Metalloligand for the Cycloaddition of Carbon Dioxide to Produce Cyclic Carbonates, *Chem. Commun.* **2016**, *52*, 13288–13291.
- S7 R. Luo, Y. Chen, Q. He, X. Lin, Q. Xu, X. He, W. Zhang, X. Zhou and H. Ji, Metallosalen-Based Ionic Porous Polymers as Bifunctional Catalysts for the Conversion of CO<sub>2</sub> into Valuable Chemicals, *ChemSusChem* **2017**, *10*, 1526–1533.
- S8 X. Liu, F. Zhou, M. Chen, W. Xu, H. Liu, J. Zhong and R. Luo, Synergistically Converting Carbon Dioxide into Cyclic Carbonates by Metalloporphyrin-Based Cationic Polymers with Imidazolium Functionality, *ChemistrySelect* **2021**, *6*, 583–588.
